# Supplementary material for: Selection of Suitable Reference Genes for qPCR Normalization under Abiotic Stresses in Oenanthe javanica (BI.) DC
Source: PubMed Central journal article supplement (PMC3961309; doi:10.1371/journal.pone.0092262), 2014-03-20

**Figure S1** The phenotype of *Oenanthe javanica*.

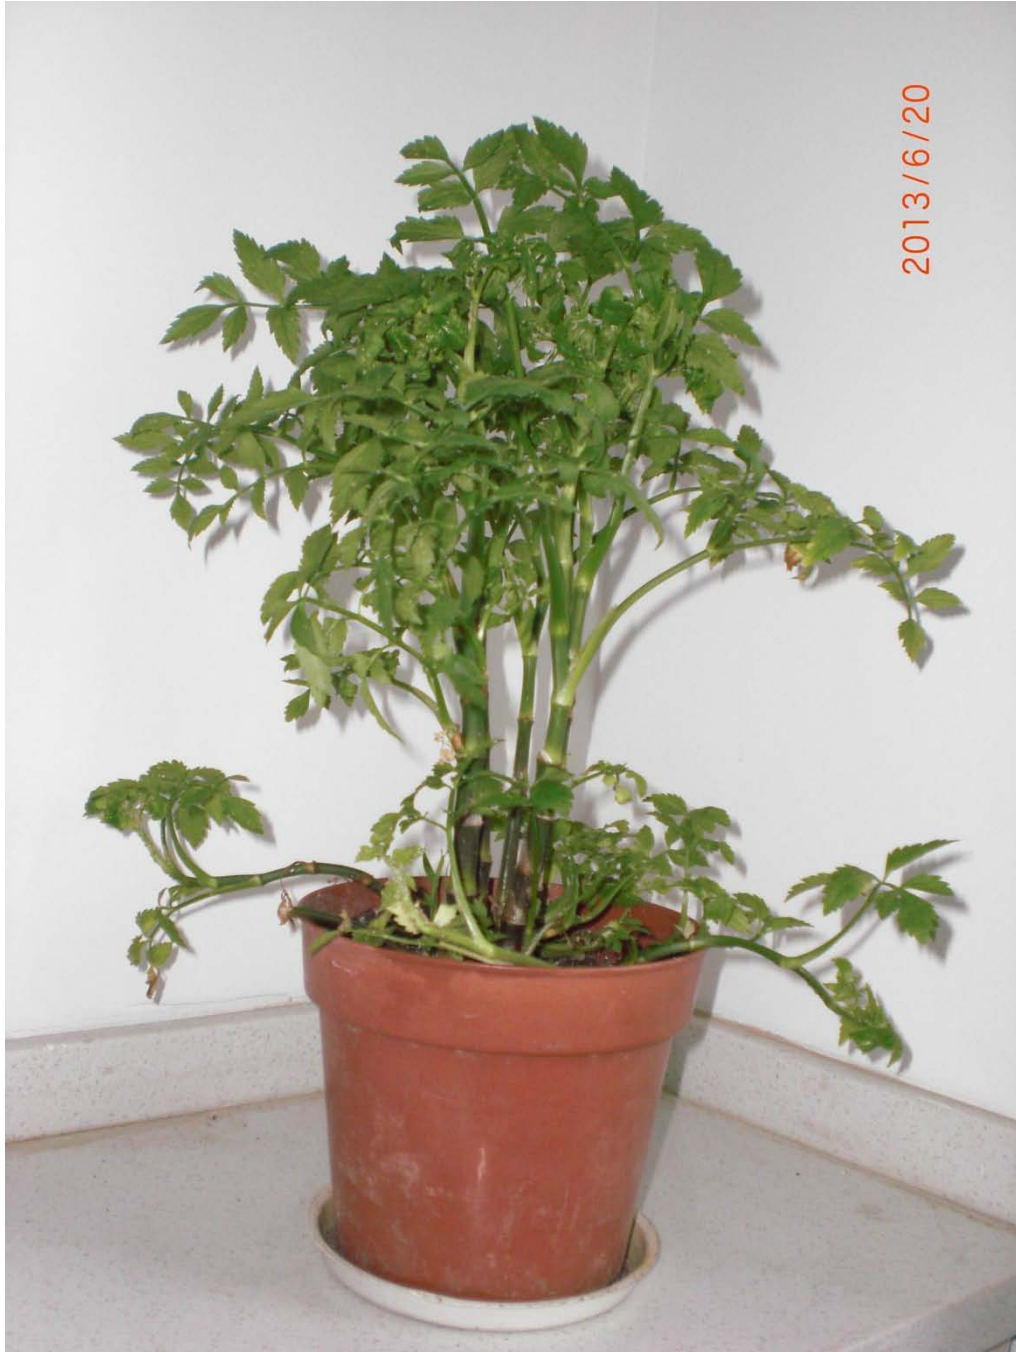

Supplement: pone.0092262.s001.pdf [file pone.0092262.s001.pdf]
