# Supplementary material for: Selection of Suitable Reference Genes for qPCR Normalization under Abiotic Stresses in Oenanthe javanica (BI.) DC
Source: PubMed Central journal article supplement (PMC3961309; doi:10.1371/journal.pone.0092262), 2014-03-20
Supplement: pone.0092262.s002.pdf [file pone.0092262.s002.pdf]

**Table S1** Primer sequences

| <b>Gene symbol</b>              | <b>Primer sequence (5'–3') forward/reverse</b>      | <b>Amplicon length (bp)</b> |
|---------------------------------|-----------------------------------------------------|-----------------------------|
| <i>eIF-4<math>\alpha</math></i> | CAACTCCTGCGGCGTAGAT/<br>ACCAACATCCTGTCATCATCCT      | 1265                        |
| <i>ACT7</i>                     | GCGATAATGGAACCTGGAATGGT/<br>TGCTGGAAGGTACTGAGAG     | 1033                        |
| <i>TIP41</i>                    | CGGTAATTAAGTCGTCGATGGA/<br>CGCAGCACAATCAGAAGGATA    | 800                         |
| <i>GAPDH</i>                    | ACTAACATCAGGCTTCCATCCA/<br>TCGTTATCGTACCAGGCTACAA   | 1330                        |
| <i>SAND</i>                     | ATATGCTCTTGCTTGCCAACT/<br>AGGTTAGCCTCAATGAAGACTT    | 942                         |
| <i>EF-1<math>\alpha</math></i>  | TGAGCGTGAGCGTGGTAT/<br>CATAGGCTTGGTTGGAATCATC       | 1000                        |
| <i>PP2A</i>                     | AGTTGGATATGTGTTGCGTGTT/<br>GCTGAAGATGTTGGTTCCTCAA   | 1321                        |
| <i>TBP</i>                      | CCCATCTAATCTCTCCCATTCT/<br>AATCTTAACACAGCCACGACAA   | 1058                        |
| <i>TUB</i>                      | AAGTATGTTGGCAAGTCGGATT/<br>TCCTCCTCGTCAGCAGTTG      | 1199                        |
| <i>M6PR</i>                     | ACACAGAGGCAGTATCACCAT/<br>AACTTGGCAGGTTGATTAGTCC    | 997                         |
| <i>M6PR</i> -qPCR               | ACTAGAGATTGCTTGGCGTATGCT/<br>AGTGGTGTGTGGGCTGTAATGC | 134                         |
