# Supplementary material for: Selection of Suitable Reference Genes for qPCR Normalization under Abiotic Stresses in Oenanthe javanica (BI.) DC
Source: PubMed Central journal article supplement (PMC3961309; doi:10.1371/journal.pone.0092262), 2014-03-20
Supplement: pone.0092262.s003.pdf [file pone.0092262.s003.pdf]

**Table S2** Raw Cq values in *Oenanthе javanica*

Plants were submitted to the following treatments: Heat, Cold, Salt, Drought, Salicylic acid (SA), Gibberellins (GA), Methyl jasmonate (JA), Abscisic acid (ABA); Control: samples without treatment.

|           | <i>ACT7</i> | <i>GAPDH</i> | <i>TIP41</i> | <i>EF-1<math>\alpha</math></i> | <i>TBP</i> | <i>eIF-4<math>\alpha</math></i> | <i>SAND</i> | <i>PP2A</i> | <i>TUB</i> |
|-----------|-------------|--------------|--------------|--------------------------------|------------|---------------------------------|-------------|-------------|------------|
| Control-1 | 21.92       | 21.85        | 25.72        | 19.78                          | 23.10      | 21.92                           | 27.16       | 22.69       | 23.92      |
| Control-2 | 22.13       | 22.13        | 25.66        | 20.01                          | 23.21      | 22.06                           | 27.31       | 22.80       | 24.04      |
| Control-3 | 22.09       | 22.04        | 25.83        | 20.02                          | 23.18      | 22.06                           | 27.19       | 22.81       | 24.04      |
| Heat-1    | 30.48       | 26.51        | 34.10        | 28.71                          | 32.49      | 30.08                           | 35.84       | 30.22       | 30.66      |
| Heat-2    | 30.75       | 26.72        | 35.38        | 29.09                          | 31.77      | 30.28                           | 35.00       | 30.98       | 31.91      |
| Heat-3    | 30.05       | 26.27        | 34.56        | 28.51                          | 31.99      | 29.86                           | 35.76       | 30.67       | 32.29      |
| Heat-4    | 28.26       | 26.47        | 31.93        | 26.38                          | 30.04      | 28.35                           | 33.25       | 27.58       | 29.17      |
| Heat-5    | 27.80       | 26.38        | 31.89        | 26.36                          | 29.60      | 27.84                           | 34.32       | 28.19       | 30.10      |
| Heat-6    | 27.78       | 26.35        | 31.70        | 26.53                          | 29.81      | 28.08                           | 33.72       | 28.85       | 28.27      |
| Heat-7    | 29.79       | 26.71        | 33.54        | 28.44                          | 32.20      | 30.52                           | 34.02       | 28.57       | 30.83      |
| Heat-8    | 30.20       | 26.65        | 33.89        | 28.60                          | 32.04      | 30.65                           | 34.80       | 29.04       | 29.76      |
| Heat-9    | 29.79       | 27.05        | 34.12        | 29.30                          | 33.11      | 31.25                           | 34.62       | 29.06       | 30.19      |
| Cold-1    | 25.35       | 25.68        | 29.66        | 23.60                          | 27.76      | 25.07                           | 30.83       | 26.02       | 25.94      |
| Cold-2    | 25.19       | 25.85        | 29.67        | 23.64                          | 27.84      | 24.99                           | 30.75       | 26.35       | 25.78      |
| Cold-3    | 25.48       | 25.64        | 29.77        | 23.65                          | 27.80      | 25.16                           | 30.60       | 25.79       | 25.95      |
| Cold-4    | 25.92       | 26.52        | 30.55        | 24.13                          | 28.99      | 26.02                           | 31.81       | 27.89       | 27.52      |
| Cold-5    | 26.07       | 25.86        | 30.65        | 23.91                          | 28.69      | 25.93                           | 31.56       | 27.72       | 26.84      |
| Cold-6    | 25.81       | 26.37        | 30.45        | 24.01                          | 28.64      | 25.92                           | 32.11       | 28.03       | 27.22      |
| Cold-7    | 27.30       | 25.46        | 30.63        | 26.37                          | 29.68      | 27.24                           | 32.55       | 27.10       | 28.94      |
| Cold-8    | 27.42       | 25.46        | 30.85        | 26.23                          | 29.70      | 27.32                           | 32.09       | 28.10       | 29.10      |
| Cold-9    | 27.46       | 25.35        | 30.68        | 26.74                          | 29.95      | 27.13                           | 32.38       | 27.76       | 28.94      |
| Salt-1    | 25.98       | 25.58        | 30.96        | 24.01                          | 28.84      | 26.50                           | 32.04       | 25.97       | 26.01      |
| Salt-2    | 26.16       | 25.68        | 30.76        | 24.08                          | 28.61      | 26.58                           | 32.43       | 26.09       | 25.75      |
| Salt-3    | 26.03       | 25.76        | 31.10        | 24.31                          | 28.93      | 26.69                           | 31.98       | 26.33       | 25.54      |
| Salt-4    | 28.00       | 26.50        | 31.86        | 25.95                          | 30.06      | 27.71                           | 32.74       | 26.97       | 26.60      |
| Salt-5    | 27.79       | 26.70        | 31.81        | 26.19                          | 30.47      | 27.83                           | 32.97       | 27.51       | 27.21      |
| Salt-6    | 28.15       | 26.69        | 31.54        | 26.41                          | 30.14      | 27.88                           | 32.82       | 27.49       | 27.03      |
| Salt-7    | 28.86       | 23.74        | 31.62        | 28.18                          | 31.09      | 28.45                           | 34.38       | 28.26       | 28.56      |
| Salt-8    | 29.12       | 23.64        | 31.26        | 28.23                          | 30.70      | 28.30                           | 34.69       | 27.73       | 28.53      |
| Salt-9    | 28.67       | 23.29        | 31.34        | 27.83                          | 30.53      | 28.26                           | 32.45       | 28.89       | 28.54      |
| Drought-1 | 26.75       | 25.95        | 31.18        | 25.11                          | 29.70      | 27.08                           | 33.64       | 28.33       | 27.22      |
| Drought-2 | 26.48       | 25.73        | 30.89        | 24.97                          | 29.62      | 27.03                           | 33.08       | 28.74       | 27.68      |
| Drought-3 | 26.73       | 25.95        | 31.41        | 25.24                          | 30.00      | 27.27                           | 33.54       | 28.18       | 27.45      |
| Drought-4 | 28.62       | 26.55        | 33.66        | 27.64                          | 34.54      | 30.13                           | 34.41       | 29.19       | 29.13      |

|           |       |       |       |       |       |       |       |       |       |
|-----------|-------|-------|-------|-------|-------|-------|-------|-------|-------|
| Drought-5 | 28.42 | 26.78 | 33.60 | 27.62 | 34.26 | 29.90 | 34.14 | 28.33 | 28.62 |
| Drought-6 | 28.85 | 26.99 | 33.44 | 27.49 | 34.40 | 30.68 | 33.09 | 28.71 | 29.72 |
| Drought-7 | 29.42 | 26.14 | 32.60 | 29.80 | 31.71 | 29.97 | 32.62 | 28.40 | 30.84 |
| Drought-8 | 29.77 | 26.44 | 32.99 | 29.71 | 32.17 | 29.89 | 34.55 | 29.02 | 30.53 |
| Drought-9 | 29.83 | 26.72 | 33.10 | 29.92 | 31.87 | 30.52 | 34.74 | 28.35 | 28.98 |
| SA-1      | 27.82 | 26.30 | 31.50 | 26.49 | 30.00 | 27.33 | 32.30 | 27.52 | 29.10 |
| SA-2      | 27.66 | 26.30 | 31.46 | 26.69 | 29.65 | 26.88 | 32.96 | 27.30 | 27.79 |
| SA-3      | 27.46 | 26.00 | 30.96 | 26.27 | 29.78 | 26.80 | 32.34 | 27.34 | 27.73 |
| SA-4      | 27.93 | 26.09 | 31.97 | 26.06 | 31.39 | 28.38 | 32.89 | 27.76 | 28.02 |
| SA-5      | 27.87 | 25.76 | 32.62 | 25.88 | 30.44 | 28.45 | 32.78 | 28.37 | 27.74 |
| SA-6      | 28.10 | 26.67 | 32.79 | 26.65 | 30.43 | 28.33 | 33.72 | 28.05 | 27.96 |
| SA-7      | 26.06 | 25.56 | 30.90 | 24.52 | 29.03 | 26.86 | 32.04 | 27.56 | 27.22 |
| SA-8      | 26.23 | 25.55 | 31.25 | 24.65 | 29.29 | 26.81 | 32.89 | 27.59 | 27.16 |
| SA-9      | 26.08 | 26.52 | 30.85 | 25.62 | 29.08 | 26.98 | 33.93 | 27.25 | 28.42 |
| GA-1      | 25.41 | 25.45 | 30.22 | 23.83 | 27.97 | 26.65 | 31.85 | 27.12 | 25.77 |
| GA-2      | 25.48 | 26.01 | 30.26 | 24.19 | 28.30 | 26.89 | 32.43 | 27.68 | 26.40 |
| GA-3      | 25.60 | 25.97 | 30.34 | 24.25 | 28.72 | 26.75 | 32.08 | 26.84 | 26.41 |
| GA-4      | 31.82 | 26.80 | 32.63 | 29.87 | 32.47 | 29.67 | 34.29 | 30.45 | 30.48 |
| GA-5      | 31.15 | 26.93 | 32.61 | 30.39 | 31.64 | 29.87 | 35.10 | 29.25 | 29.63 |
| GA-6      | 30.85 | 26.49 | 32.34 | 29.98 | 33.21 | 29.35 | 33.57 | 29.05 | 30.27 |
| GA-7      | 26.65 | 26.08 | 33.00 | 24.52 | 29.60 | 27.67 | 32.55 | 27.66 | 27.79 |
| GA-8      | 26.66 | 25.95 | 32.01 | 24.51 | 29.89 | 27.64 | 32.44 | 27.34 | 27.60 |
| GA-9      | 26.69 | 26.36 | 32.03 | 24.86 | 30.52 | 27.80 | 32.06 | 28.09 | 27.69 |
| ABA-1     | 30.04 | 27.02 | 33.96 | 28.68 | 32.32 | 29.69 | 34.22 | 29.51 | 31.69 |
| ABA-2     | 30.08 | 26.85 | 33.93 | 28.39 | 31.19 | 29.58 | 33.64 | 30.18 | 29.71 |
| ABA-3     | 30.53 | 27.92 | 34.49 | 29.57 | 33.47 | 29.75 | 34.08 | 30.07 | 31.45 |
| ABA-4     | 24.42 | 24.83 | 31.11 | 22.89 | 27.93 | 25.70 | 31.10 | 25.54 | 25.49 |
| ABA-5     | 24.64 | 24.34 | 31.47 | 22.58 | 28.69 | 25.73 | 30.67 | 25.15 | 24.58 |
| ABA-6     | 24.55 | 24.90 | 30.89 | 23.12 | 28.64 | 25.79 | 31.06 | 25.93 | 25.77 |
| ABA-7     | 30.42 | 26.59 | 31.26 | 28.67 | 30.75 | 27.66 | 34.04 | 29.09 | 29.75 |
| ABA-8     | 29.46 | 26.65 | 31.29 | 28.23 | 31.19 | 27.41 | 34.69 | 28.79 | 32.68 |
| ABA-9     | 29.73 | 26.43 | 31.62 | 28.29 | 30.82 | 27.48 | 33.92 | 28.80 | 31.79 |
| MeJA-1    | 31.48 | 25.90 | 32.84 | 30.83 | 31.76 | 29.09 | 34.85 | 30.47 | 30.28 |
| MeJA-2    | 29.80 | 25.82 | 32.88 | 31.11 | 33.28 | 29.12 | 34.33 | 29.71 | 31.10 |
| MeJA-3    | 31.05 | 25.96 | 32.45 | 30.52 | 31.64 | 28.99 | 35.20 | 29.51 | 31.57 |
| MeJA-4    | 27.39 | 26.40 | 32.15 | 26.54 | 31.62 | 28.39 | 33.28 | 27.47 | 27.28 |
| MeJA-5    | 27.69 | 26.13 | 31.97 | 26.31 | 30.45 | 28.78 | 33.68 | 27.09 | 26.74 |
| MeJA-6    | 27.61 | 26.00 | 32.40 | 26.59 | 31.61 | 28.76 | 33.56 | 27.77 | 27.39 |
| MeJA-7    | 31.02 | 25.42 | 32.77 | 31.01 | 34.27 | 30.81 | 33.42 | 29.28 | 30.27 |
| MeJA-8    | 31.57 | 25.74 | 33.20 | 31.36 | 33.10 | 30.90 | 35.89 | 28.42 | 29.33 |
| MeJA-9    | 32.63 | 25.70 | 32.87 | 30.88 | 32.36 | 30.28 | 35.69 | 29.19 | 29.69 |
