# Supplementary material for: Selection of Suitable Reference Genes for qPCR Normalization under Abiotic Stresses in Oenanthe javanica (BI.) DC
Source: PubMed Central journal article supplement (PMC3961309; doi:10.1371/journal.pone.0092262), 2014-03-20
Supplement: pone.0092262.s004.pdf [file pone.0092262.s004.pdf]

2

**Table S3** Data statistics of Cq values of candidate reference genes

4

|                                 | <b>N total</b> | <b>Median</b> | <b>Mean</b> | <b>Standard<br/>Deviation</b> | <b>Minimum</b> | <b>Maximum</b> |
|---------------------------------|----------------|---------------|-------------|-------------------------------|----------------|----------------|
| <i>ACT7</i>                     | 72             | 27.85         | 28.11       | 2.02                          | 24.42          | 32.63          |
| <i>GAPDH</i>                    | 72             | 26.11         | 26.05       | 0.78                          | 23.29          | 27.92          |
| <i>TIP41</i>                    | 72             | 31.84         | 31.98       | 1.28                          | 29.66          | 35.38          |
| <i>EF-1<math>\alpha</math></i>  | 72             | 26.51         | 26.83       | 2.37                          | 22.58          | 31.36          |
| <i>TBP</i>                      | 72             | 30.44         | 30.64       | 1.74                          | 27.76          | 34.54          |
| <i>eIF-4<math>\alpha</math></i> | 72             | 27.86         | 28.13       | 1.61                          | 24.99          | 31.25          |
| <i>SAND</i>                     | 72             | 33.27         | 33.28       | 1.31                          | 30.60          | 35.89          |
| <i>PP2A</i>                     | 72             | 28.10         | 28.12       | 1.27                          | 25.15          | 30.98          |
| <i>TUB</i>                      | 72             | 28.47         | 28.52       | 1.91                          | 24.58          | 32.68          |

6
